# Supplementary material for: The Role of Micro-RNAs and Circulating Tumor Markers as Predictors of Response to Neoadjuvant Therapy in Locally Advanced Rectal Cancer
Source: Int J Mol Sci. 2020 Sep 24;21(19):7040. doi: 10.3390/ijms21197040 (PMC7582560; doi:10.3390/ijms21197040)
Supplement: Supplementary file 1 [file ijms-21-07040-s001.xlsx]

## Sheet: miRNAs
	Supplementary Table 1. microRNAs Emerged as Predictive Tissue Biomarkers of Response to Neoadjuvant Chemoradiotherapy in Locally Advanced Rectal Cancer.
	miRNA	Specimen	Level of expression to predict good response to nCRT	Neodjuvant therapy (Radiotherapy; Chemotherapy)	Association with TRG	Response assessement	Detection method	Method of validation
	let-7e	frozen tissue biopsies	high	45 + 5.6 Gy; Capecitabine or 5-FU	TRG 1-2	Mandard scale	microRNA array	-
	let-7f	frozen tissue biopsies	low	50.4 Gy; capecitabine with/or withouth oxaliplatin	TRG 1-2	Mandard scale	microRNA array	RT-qPCR
	miR-18a	frozen tissue biopsies	high	50.4 Gy; capecitabine with/or withouth oxaliplatin	TRG 1-2	Mandard scale	microRNA array	RT-qPCR
	miR-19-3p	frozen tissue biopsies	high	40 Gy; tegafur/gimeracil/oteracil	-	RECIST	microRNA array	-
	miR-21	FFPE tissues	low	50.5 Gy; 5-FU	TRG 3-4	Schneider scale	RT-qPCR	-
		FFPE tissues	low	50.5 Gy; 5-FU	TRG 0	Ryan modifed scale	RT-qPCR	-
		FFPE tissues	high	50.4-60 Gy; tegafur-uracil and L-leucovorin	TRG 1-2	Mandard scale	RT-qPCR	RT-qPCR
		FFPE tissues	low	45–50 Gy; 5-FU	TRG 4	Dworak scale	microRNA array	RT-qPCR
	miR-21-5p	frozen tissue biopsies	high	50.4-54 Gy; 5-FU	TRG 4	Dworak scale	RNA-seq	RT-qPCR
	miR-29b-2*	frozen tissue biopsies	low	45 + 5.6 Gy; Capecitabine or 5-FU	TRG 1-2	Mandard scale	microRNA array	-
	miR-30b	frozen tissue biopsies	low	50.4 Gy; capecitabine with/or withouth oxaliplatin	TRG 1-2	Mandard scale	microRNA array	RT-qPCR
	miR-31	FFPE tissues	low	50.5 Gy; 5-FU	TRG 0-1	Ryan scale	RT-qPCR	-
		frozen tissue biopsies	high	40 Gy; tegafur-uracil	-	RECIST	microRNA array	-
	miR-34b	frozen tissue biopsies	high	40 Gy; tegafur-uracil	-	RECIST	microRNA array	-
	miR-99a*	frozen tissue biopsies	high	45 + 5.6 Gy; Capecitabine or 5-FU	TRG 1-2	Mandard scale	microRNA array	-
	miR-99	FFPE tissues	low	45–50 Gy; 5-FU	TRG 4	Dworak scale	microRNA array	RT-qPCR
	miR-125a-3p	frozen tissue biopsies	high	45 Gy; capecitabine and oxaliplatin	TRG 1	Mandard scale	microRNA array	RT-qPCR
	miR-125b	tissue biopsies in RNA Later solution	low	50.4 Gy; capecitabine	TRG 3-5	Mandard scale	RT-qPCR	-
	miR-137	tissue biopsies in RNA Later solution	low	50.4 Gy; capecitabine	TRG 3-5	Mandard scale	RT-qPCR	-
	miR-143	FFPE tissues	high	50.5 Gy; 5-FU	TRG 3-4	Schneider scale	RT-qPCR	-
	miR-144	frozen tissue biopsies	high	40 Gy; tegafur-uracil	-	RECIST	microRNA array	-
	miR-144*	frozen tissue biopsies	high	40 Gy; tegafur-uracil	-	RECIST	microRNA array	-
	miR-145	FFPE tissues	high	50.5 Gy; 5-FU	TRG 3-4	Schneider scale	RT-qPCR	-
		frozen tissue biopsies	low	50.4 Gy; capecitabine with/or withouth oxaliplatin	TRG 1-2	Mandard scale	microRNA array	RT-qPCR
		FFPE tissues	high	50.5 Gy; 5-FU	TRG 3-4	Rodel scale	RT-qPCR	-
	miR-148a	frozen tissue biopsies	low	50.4 Gy capecitabine with/or withouth oxaliplatin	TRG 1-2	Mandard scale	microRNA array	RT-qPCR
	miR-154	frozen tissue biopsies	high	40 Gy; tegafur-uracil	-	RECIST	microRNA array	-
	miR-188-5p	frozen tissue biopsies	high	45 Gy; capecitabine and oxaliplatin	TRG 1	Mandard scale	microRNA array	RT-qPCR
	miR-190b	frozen tissue biopsies	low	45 + 5.6 Gy; capecitabine or 5-FU	TRG 1-2	Mandard scale	microRNA array	-
	miR-193a-5p	frozen tissue biopsies	high	40 Gy; tegafur-uracil	-	RECIST	microRNA array	-
	miR-194	frozen tissue biopsies	high	45-55 Gy; capecitabine or capecitabine and oxaliplatin or 5-FU and oxaliplatin	TRG 1-2	Mandard	microRNA array	RT-qPCR and ISH
	miR-196b	frozen tissue biopsies	high	45 + 5.6 Gy; capecitabine or 5-FU	TRG 1-2	Mandard scale	microRNA array	-
	miR-215	frozen tissue biopsies	low	46 + 5.6 Gy; capecitabine or 5-FU	TRG 1-2	Mandard scale	microRNA array	-
	miR-223	frozen tissue biopsies	high	40 Gy; tegafur/gimeracil/oteracil	TRG 2-3	JSCCR	microRNA array	RT-qPCR
		frozen tissue biopsies	high	40 Gy; tegafur-uracil	-	RECIST	microRNA array	-
		frozen tissue biopsies	high	40 Gy; tegafur-uracil	-	RECIST	microRNA array	-
	miR-335	frozen tissue biopsies	high	40 Gy; tegafur-uracil	-	RECIST	microRNA array	-
	miR-363	frozen tissue biopsies	high	40 Gy; tegafur-uracil	-	RECIST	microRNA array	-
	miR-375	frozen tissue biopsies	low	50.4 Gy; capecitabine with/or withouth oxaliplatin	TRG 1-2	Mandard scale	microarray	RT-qPCR
		FFPE tissues	low	45–50 Gy; 5-FU	TRG 4	Dworak scale	microRNA array	RT-qPCR
	miR-379	frozen tissue biopsies	high	40 Gy; tegafur-uracil	-	RECIST	microRNA array	-
	miR-382	frozen tissue biopsies	high	40 Gy; tegafur-uracil	-	RECIST	microRNA array	-
	miR-450a	frozen tissue biopsies	high	45 + 5.6 Gy; capecitabine or 5-FU	TRG 1-2	Mandard scale	microRNA array	-
	miR-450b-5p	frozen tissue biopsies	high	45 + 5.6 Gy; capecitabine or 5-FU	TRG 1-2	Mandard scale	microRNA array	-
	miR-451	frozen tissue biopsies	low	50.4 Gy; capecitabine with/or withouth oxaliplatin	TRG 1-2	Mandard scale	microRNA array	RT-qPCR
		frozen tissue biopsies	high	40 Gy; tegafur-uracil	-	RECIST	microRNA array	-
	miR-483-5p	frozen tissue biopsies	high	45 Gy; capecitabine and oxaliplatin	TRG 1	Mandard scale	microRNA array	RT-qPCR
	miR-486-5p	frozen tissue biopsies	high	40 Gy; tegafur-uracil	-	RECIST	microRNA array	-
	miR-487a-3p	frozen tissue biopsies	low	50.4 Gy; capecitabine or 5-FU	TRG 1-2	Mandard scale	RNA-seq	RT-qPCR
	miR-494	frozen tissue biopsies	high	40 Gy; tegafur/gimeracil/oteracil	-	RECIST	microRNA array	-
	miR-513a-5p	frozen tissue biopsies	high	40 Gy; tegafur/gimeracil/oteracil	-	RECIST	microRNA array	-
	miR-513b	frozen tissue biopsies	high	40 Gy; tegafur/gimeracil/oteracil	-	RECIST	microRNA array	-
	miR-519b-3p	frozen tissue biopsies	high	45-55 Gy; capecitabine or capecitabine and oxaliplatin or 5-FU and oxaliplatin	n.r.	n.r.	in silico prediction based on microRNA array	RT-QPCR and ISH
		frozen tissue biopsies	low	50.4 Gy; capecitabine with/or withouth oxaliplatin	TRG 1-2	Mandard scale	microRNA array	RT-qPCR
	miR-548c-5p	frozen tissue biopsies	high	45Gy; capecitabine and oxaliplatin	TRG 1	Mandard	microRNA array	-
	miR-548d-5p	frozen tissue biopsies	high	45Gy; capecitabine and oxaliplatin	TRG 1	Mandard	microRNA array	-
	miR-622	frozen tissue biopsies	high	45Gy; capecitabine and oxaliplatin	TRG 1	Mandard scale	microarray	RT-qPCR
		tissues biopsies	low	45Gy; capecitabine and oxaliplatin	TRG 1-3	Mandard scale	RT-qPCR	-
	miR-630,	frozen tissue biopsies	high	45Gy; capecitabine and oxaliplatin	TRG 1	Mandard scale	microRNA array	RT-qPCR
		tissues biopsies	low	50.4 Gy; capecitabine or capecitabine and oxaliplatin or 5-FU and oxaliplatin	TRG 1-2	Mandard scale	microarray	RT-qPCR
	miR-650	frozen tissue biopsies	low	50.4 Gy; capecitabine with/or withouth oxaliplatin	TRG 1-2	Mandard scale	microRNA array	RT-qPCR
	miR-663a	frozen tissue biopsies	high	45Gy; capecitabine-oxaliplatin	TRG 1	Mandard	microRNA array	-
	miR-671-5p	frozen tissue biopsies	high	45 Gy; capecitabine and oxaliplatin	TRG 1	Mandard scale	microRNA array	RT-qPCR
	miR-720	frozen tissue biopsies	low	45 Gy; capecitabine and oxaliplatin	TRG 1	Mandard scale	microRNA array	RT-qPCR
	miR-765	frozen tissue biopsies	high	45 Gy; capecitabine and oxaliplatin	TRG 1	Mandard scale	microRNA array	RT-qPCR
	miR-866-3p	frozen tissue biopsies	high	40 Gy; tegafur/gimeracil/oteracil	-	RECIST	microRNA array	-
	miR-923	frozen tissue biopsies	high	40 Gy; tegafur/gimeracil/oteracil	-	RECIST	microRNA array	-
	miR-1183	frozen tissue biopsies	high	45 Gy; capecitabine and oxaliplatin	TRG 1	Mandard scale	microRNA array	RT-qPCR
		frozen tissue biopsies	low	50.4Gy; capecitabine with or without oxaliplatin	TRG 1-2	Mandard scale	microRNA array	RT-qPCR
	miR-1224-5p	frozen tissue biopsies	high	45 Gy; capecitabine and oxaliplatin	TRG 1	Mandard scale	microRNA array	RT-qPCR
	miR-1233	frozen tissue biopsies	low	50.4Gy; capecitabine with or without oxaliplatin	TRG 1-2	Mandard scale	microRNA array	RT-qPCR
	miR-1243	frozen tissue biopsies	low	50.4Gy; capecitabine with or without oxaliplatin	TRG 1-2	Mandard scale	microRNA array	RT-qPCR
	miR-1246	frozen tissue biopsies	high	50.4-54 Gy; 5-FU	TRG 4	Dworak scale	RNA-seq	RT-qPCR
		frozen tissue biopsies	high	40 Gy; tegafur-uracil	-	RECIST	microRNA array	-
	miR-1274b	frozen tissue biopsies	low	45 Gy; capecitabine and oxaliplatin	TRG 1	Mandard scale	microRNA array	RT-qPCR
	miR-1290	frozen tissue biopsies	high	40 Gy; tegafur-uracil	-	RECIST	microRNA array	-
	miR-1290-3p	frozen tissue biopsies	high	50.4-54 Gy; 5-FU	TRG 4	Dworak scale	RNA-seq	RT-qPCR
	miR-1471	frozen tissue biopsies	high	45 Gy; capecitabine and oxaliplatin	TRG 1	Mandard scale	microRNA array	RT-qPCR
	miR-1542-5p	frozen tissue biopsies	high	40 Gy; tegafur-uracil	-	RECIST	microRNA array	-
	miR-1909*	frozen tissue biopsies	high	45 Gy; capecitabine and oxaliplatin	TRG 1	Mandard scale	microRNA array	RT-qPCR
	FFPE, formalin-fixed paraffin-embedded biopsies; Gy, the gray; ISH, in situ hybridization; JSCCR, japanese society for cancer of the colon and rectum; miRNA, microRNA; n.r., not reported; RECIST, response evaluation criteria in solid tumours; RT-qPCR, realtime quantitvative PCR; RNA-seq, RNA-sequencing method; TRG, tumor regression grade; 5-FU, 5-Fluouracil.
